# Supplementary material for: Information and Communication Technologies for the Dissemination of Clinical Practice Guidelines to Health Professionals: A Systematic Review
Source: PubMed Central journal article supplement (PMC5156823; doi:10.2196/mededu.6288), 2016-11-30
Supplement: mededu_v2i2e16_app1.pdf [file mededu_v2i2e16_app1.pdf]

MEDLINE

Database: Ovid MEDLINE(R) In-Process & Other Non-Indexed Citations and Ovid MEDLINE(R)

Search Strategy:

- 
- 1 local area networks/
  - 2 exp telemedicine/
  - 3 (telemedicine or "tele health").tw.
  - 4 computer communication networks/
  - 5 internet/
  - 6 blogging/
  - 7 social media/
  - 8 electronic mail/
  - 9 search engine/
  - 10 ("remote communication\*" or "remote consultation\*").tw.
  - 11 information services/
  - 12 (ehealth or e-health or m-health or mhealth or "health informatics").tw.
  - 13 (internet or email or www or "world wide web" or virtual or "web site" or website).tw.
  - 14 (e-learning or elearning or telecommunicat\$).tw.
  - 15 databases, bibliographic/
  - 16 health information exchange/
  - 17 libraries, digital/
  - 18 ("computerised reminder\$" or "computerized reminder\$").tw.
  - 19 ("social media\*" or "second life" or facebook\* or youtube or twitter\* or tweet\* or webmd or linkedin or noodle or zotero or mendeley or refworks or endnote or picsearch or flickr or Skype or elluminate or upstream).tw.
  - 20 1 or 2 or 3 or 4 or 5 or 6 or 7 or 8 or 9 or 10 or 11 or 12 or 13 or 14 or 15 or 16 or 17 or 18 or 19
  - 21 (clinician\* or dentist\* or doctor\* or family practition\* or general practition\* or physician\* or gyn?ecologist\* or h?ematologist\* or internist\* or nurse\* or obstetrician\* or occupational therapist\* or p?ediatrician\* or pharmacist\* or physiotherapist\* or psychiatrist\* or psychologist\* or radiologist\* or surgeon\* or therapist\* or counsel?or\* or neurologist\* or optometrist\* or "health profession\*" or health\* personnel or "health care profession\*" OR "health care personnel" or resident\*).ti,ab.
  - 22 exp evidence-based medicine/
  - 23 clinical competence/
  - 24 professional competence/
  - 25 professional practice/
  - 26 guideline adherence/
  - 27 guidelines as topic/
  - 28 22 or 23 or 24 or 25 or 26 or 27
  - 29 randomized controlled trial.pt.
  - 30 controlled clinical trial.pt.
  - 31 randomized.ab.
  - 32 placebo.ab.
  - 33 clinical trials as topic.sh.
  - 34 randomly.ab.
  - 35 trial.ti.
  - 36 (control\* adj8 trial\*).ti,ab.
  - 37 (systematic: review or systematic: overview).ti,ab. or meta-analysis.pt,sh. or (meta-anal: or metaanal:).tw.
  - 38 29 or 30 or 31 or 32 or 33 or 34 or 35 or 36 or 37

39 exp animals/ not humans.sh.  
40 38 not 39  
41 20 and 21 and 28 and 40

\*\*\*\*\*

Database: Ovid MEDLINE(R) In-Process & Other Non-Indexed Citations and Ovid MEDLINE(R)  
Search Strategy:

-----  
1 (telemedicine or "tele health").tw.  
2 ("remote communication\*" or "remote consultation\*").tw.  
3 (ehealth or e-health or m-health or mhealth or "health informatics").tw.  
4 (internet or email or www or "world wide web" or virtual or "web site" or website).tw.  
5 (e-learning or elearning or telecommunicat\$).tw.  
6 ("digital librar\*" or "electronic librar\*").tw.  
7 ("computerised reminder\$" or "computerized reminder\$").tw.  
8 ("social media\*" or "second life" or facebook\* or youtube or twitter\* or tweet\* or webmd or linkedin or noodle or zotero or mendeley or refworks or endnote or picsearch or flickr or Skype or elluminate or upstream).tw.  
9 email or internet or social media).ti,ab.  
10 1 or 2 or 3 or 4 or 5 or 6 or 7 or 8 or 9  
11 ("clinical competence" or evidence-based or "professional competence" or guideline\*).ti,ab.  
12 (randomized or placebo or randomly).ab. or trial.ti. or (control\* adj8 trial\*).ti,ab. or (systematic: review or systematic: overview).ti,ab. or (meta-anal: or metaanal:).tw.  
13 10 and 11 and 12  
14 limit 13 to in process

\*\*\*\*\*

#### COCHRANE CENTRAL

Database: EBM Reviews - Cochrane Central Register of Controlled Trials  
Search Strategy:

-----  
1 (clinician\* or dentist\* or doctor\* or "family practicion\*" or "general practicion\*" or physician\* or gyn?ecologist\* or h?ematologist\* or internist\* or nurse\* or obstetrician\* or "occupational therapist\*" or p?ediatrician\* or pharmacist\* or physiotherapist\* or psychiatrist\* or psychologist\* or radiologist\* or surgeon\* or therapist\* or counsel?or\* or neurologist\* or optometrist\* or "health\* professional\*" or health\* personnel or "health care professional\*" OR "health care personnel" or resident\*).ti,ab.  
2 ("clinical practic\*" or "clinical competenc\*" or "professional practice" or "professional competenc\*" or "guideline\* adj3 adherence" or "evidence-based" or "evidence based").ti,ab.  
3 (phone\* or texting or email\* or email\* or MSN\* or SMS\* or pda or "personal digital assistant\*" or "smart phone\*" or smartphone\* or i-phone\* or i phone\* or tablet or computer\* or internet or "information communication technolog\*" or online or Virtual or "world wide web\*" or "social media\*" or "second life" or facebook\* or youtube or twitter\* or tweet\* or webmd or linkedin or noodle or zotero or mendeley or refworks or endnote or picsearch or flicker or blog\* or wiki or podcast\* or "RSS feed\*" or "really simple syndicat\*" or "video conferenc\*" or teleconference\* or "real-time app\*" or "real time app\*" or Skype or illuminate or stream or "digital librar\*" or "electronic librar\*" or "electronic database\*").ti,ab.  
4 1 and 2 and 3

\*\*\*\*\*

EMBASE

Database: Embase Classic+Embase

Search Strategy:

- 
- 1 local area network/
  - 2 exp telehealth/
  - 3 (telemedicine or "tele health").tw.
  - 4 computer network/
  - 5 internet/
  - 6 social media/
  - 7 e-mail/
  - 8 search engine/
  - 9 ("remote communication\*" or "remote consultation\*").tw.
  - 10 information service/
  - 11 (health or e-health or m-health or mhealth or "health informatics").tw.
  - 12 (internet or email or www or "world wide web" or virtual or "web site" or website).tw.
  - 13 (e-learning or elearning or telecommunicat\$).tw.
  - 14 exp bibliographic database/
  - 15 ("digital librar\*" or "electronic librar\*").tw.
  - 16 ("computerised reminder\$" or "computerized reminder\$").tw.
  - 17 ("social media\*" or "second life" or facebook\* or youtube or twitter\* or tweet\* or webmd or linkedin or noodle or zotero or mendeley or reworks or endnote or picsearch or flickr or Skype or elluminate or upstream).tw.
  - 18 1 or 2 or 3 or 4 or 5 or 6 or 7 or 8 or 9 or 10 or 11 or 12 or 13 or 14 or 15 or 16 or 17
  - 19 (clinician\* or dentist\* or doctor\* or family practition\* or general practition\* or physician\* or gyn?ecologist\* or h?ematologist\* or internist\* or nurse\* or obstetrician\* or occupational therapist\* or p?ediatrician\* or pharmacist\* or physiotherapist\* or psychiatrist\* or psychologist\* or radiologist\* or surgeon\* or therapist\* or counsel?or\* or neurologist\* or optometrist\* or "health profession\*" or health\* personnel or "health care profession\*" OR "health care personnel" or resident\*).ti,ab.
  - 20 \*evidence based medicine/ or \*evidence based practice/ or \*evidence based nursing/ or \*evidence based emergency medicine/ or \*evidence based dentistry/ or \*evidence based practice center/
  - 21 \*clinical competence/
  - 22 exp \*professional competence/
  - 23 \*good clinical practice/
  - 24 \*practice guideline/
  - 25 20 or 21 or 22 or 23 or 24
  - 26 controlled clinical trial/
  - 27 randomized controlled trial/
  - 28 randomized.ab.
  - 29 placebo.ab.
  - 30 randomly.ab.
  - 31 trial.ti.
  - 32 (control\* adj8 trial\*).ti,ab.
  - 33 (systematic: review or systematic: overview).ti,ab. or meta-analysis.pt,sh. or (meta-anal: or metaanal:).tw.
  - 34 26 or 27 or 28 or 29 or 30 or 31 or 32 or 33
  - 35 18 and 19 and 25 and 34

\*\*\*\*\*

PsycINFO

Database: PsycINFO

Search Strategy:

- 
- 1 internet/
  - 2 computer mediated communication/
  - 3 cellular phones/
  - 4 electronic communication/
  - 5 social media/
  - 6 computer searching/
  - 7 mobile devices/
  - 8 telemedicine/
  - 9 teleconferencing/
  - 10 (telemedicine or "tele health").tw.
  - 11 online social networks/
  - 12 ("remote communication\*" or "remote consultation\*").tw.
  - 13 (ehealth or e-health or m-health or mhealth or "health informatics").tw.
  - 14 (internet or email or www or "world wide web" or virtual or "web site" or website).tw.
  - 15 (e-learning or elearning or telecommunicat\$).tw.
  - 16 automated information retrieval/
  - 17 computer searching/
  - 18 information technology/
  - 19 ("digital librar\*" or "electronic librar\*").tw.
  - 20 ("computerised reminder\$" or "computerized reminder\$").tw.
  - 21 ("social media\*" or "second life" or facebook\* or youtube or twitter\* or tweet\* or webmd or linkedin or noodle or zotero or mendeley or refworks or endnote or picsearch or flickr or Skype or elluminate or upstream).tw.
  - 22 1 or 2 or 3 or 4 or 5 or 6 or 7 or 8 or 9 or 10 or 11 or 12 or 13 or 14 or 15 or 16 or 17 or 18 or 19 or 20 or 21
  - 23 (clinician\* or dentist\* or doctor\* or family practition\* or general practition\* or physician\* or gyn?ecologist\* or h?ematologist\* or internist\* or nurse\* or obstetrician\* or occupational therapist\* or p?ediatrician\* or pharmacist\* or physiotherapist\* or psychiatrist\* or psychologist\* or radiologist\* or surgeon\* or therapist\* or counsel?or\* or neurologist\* or optometrist\* or "health profession\*" or health\* personnel or "health care profession\*" OR "health care personnel" or resident\*).ti,ab.
  - 24 clinical practice/
  - 25 professional competence/
  - 26 treatment guidelines/
  - 27 evidence based practice/
  - 28 24 or 25 or 26 or 27
  - 29 randomized.ab.
  - 30 placebo.ab.
  - 31 randomly.ab.
  - 32 trial.ti.
  - 33 (control\* adj8 trial\*).ti,ab.
  - 34 (systematic: review or systematic: overview).ti,ab. or meta-analysis.pt,sh. or (meta-anal: or metaanal:).tw.
  - 35 29 or 30 or 31 or 32 or 33 or 34
  - 36 22 and 23 and 28 and 35

\*\*\*\*\*
