# Supplementary material for: Information and Communication Technologies for the Dissemination of Clinical Practice Guidelines to Health Professionals: A Systematic Review
Source: PubMed Central journal article supplement (PMC5156823; doi:10.2196/mededu.6288), 2016-11-30
Supplement: mededu_v2i2e16_app3.pdf [file mededu_v2i2e16_app3.pdf]

| <b>Study</b>             | <b>Country</b> | <b>Study Design</b> | <b>Population</b>                             | <b>Intervention</b>                                                                        | <b>Comparator</b>                                             | <b>Outcome(s) (Framework)</b>                                                      | <b>Duration/Follow-up</b>                  |
|--------------------------|----------------|---------------------|-----------------------------------------------|--------------------------------------------------------------------------------------------|---------------------------------------------------------------|------------------------------------------------------------------------------------|--------------------------------------------|
| Balamuth et al. [22]     | US             | RCT                 | physicians                                    | Online 1-page summary sheet of guidelines (n=128)                                          | Web link to guidelines (n=109)                                | Knowledge (TDF)<br>Perceived Ease of Use (TAM2)                                    | 6 weeks                                    |
| Bell et al. [23]         | US             | RCT                 | family and internal medicine residents        | Self-study online guidelines (n=79)                                                        | Print-based guidelines (n=83)                                 | Knowledge (TDF)<br>Perceived Ease of Use (TAM2)                                    | immediate post-intervention, 4 to 6 months |
| Bernhardsson et al. [33] | Sweden         | CCT                 | physiotherapists                              | Multifaceted: Implementation seminar/group discussion, website and email reminders (n=168) | No intervention (n=88)                                        | Knowledge (TDF)<br>Perceived Ease of Use (TAM2)                                    | 12 months                                  |
| Bullard et al. [26]      | Canada         | RCT                 | physicians                                    | Wirelessly networked mobile computer program (n=10)**                                      | Desktop computer program (n=10)**                             | Perceived Usefulness (TAM2)                                                        | 8-hour shifts/3 months                     |
| Butzlaff et al. [27]     | Germany        | RCT                 | physicians                                    | CPGs via CD-ROM/Internet (n=53)                                                            | No intervention (n=66)                                        | Knowledge (TDF)                                                                    | ~70 days, ~5 months                        |
| Chan et al. [34]         | Canada         | RCT                 | nurses                                        | Multifaceted in-person education session and online support (n=31)                         | No intervention (n=22)                                        | Beliefs about capabilities (TDF)<br>Intention (TDF)<br>Perceived Usefulness (TAM2) | 2 weeks                                    |
| Desimone et al. [35]     | US             | RCT                 | internal medicine residents                   | Multifaceted: In person education, online support, printed material (n=11)                 | Usual education (n=11)                                        | Knowledge (TDF)                                                                    | 4 weeks                                    |
| Epstein et al. [20]      | US             | RCT                 | physicians (pediatricians)                    | Online didactic education session/workshop (n=27)                                          | No intervention (received intervention after 6 months) (n=22) | Skills (TDF)                                                                       | 6 months                                   |
| Fordis et al. [29]       | US             | RCT                 | physicians                                    | Live online CME workshop (n=51)<br><br>Online CME workshop (n=52)                          | No intervention (n=20)                                        | Knowledge (TDF)<br>Skills (TDF)<br>Perceived Usefulness (TAM2)                     | 12 weeks                                   |
| Gill et al. [30]         | US             | RCT                 | physicians/clinicians in ambulatory practices | EHR-based clinical decision support (n=53)                                                 | No intervention (n=66)                                        | Skills (TDF)                                                                       | 12 months                                  |
| Schroter et al. [17]     | UK/Germany     | RCT                 | physicians/nurses                             | Interactive web-based tool + online material (n=527)                                       | Online material (n=527)                                       | Knowledge (TDF)<br>Perceived Usefulness (TAM2)                                     | 4 months                                   |
| Jousimaa et al. [28]     | Finland        | RCT                 | physicians                                    | CD-ROM computer-based guidelines (n=72)                                                    | Text-book-based guidelines (n=67)                             | Skills (TDF)                                                                       | 1 month                                    |
| Kerfoot et al. [21]      | International* | RCT                 | physicians (urologists)                       | Online game/survey 2 questions every 2 days (n=735)                                        | Online game/survey 4 questions every 4 days (n=735)           | Knowledge (TDF)                                                                    | 34 weeks                                   |
| Lobach et al. [19]       | US             | RCT                 | physicians /general internist/nurses/ph       | Biweekly email of computer based audit/feedback                                            | No intervention (n=23)                                        | Skills (TDF)                                                                       | 12 weeks                                   |

|                      |             |     |                                                        |                                                                                                                                                                                                                                   |                                                                                              |                                                        |                                                                              |
|----------------------|-------------|-----|--------------------------------------------------------|-----------------------------------------------------------------------------------------------------------------------------------------------------------------------------------------------------------------------------------|----------------------------------------------------------------------------------------------|--------------------------------------------------------|------------------------------------------------------------------------------|
|                      |             |     | physician<br>assistant/family<br>medicine<br>residents | program (n=22)                                                                                                                                                                                                                    |                                                                                              |                                                        |                                                                              |
| McDonald et al. [36] | UK          | RCT | nurses                                                 | Multifaceted:<br>Email reminder<br>with provider<br>prompts, patient<br>education<br>material, and<br>clinical nurse<br>specialist outreach<br>(n=97)<br><br>Email reminder of<br>recommendations<br>(n=121)                      | Usual care (n=118)                                                                           | Skills (TDF)                                           | 24 months                                                                    |
| Fretheim et al. [18] | US          | RCT | physicians and<br>practice nurses                      | Multifaceted:<br>Educational<br>Outreach Visit,<br>Audit and<br>Feedback at<br>Outreach Visit,<br>Computerized<br>Reminders , Risk<br>Assessment<br>Tools, Patient<br>Information<br>Material,<br>Telephone follow-<br>up (n=257) | Passive guideline<br>dissemination<br>(n=244)                                                | Skills (TDF)                                           | 45 days                                                                      |
| Peremans et al. [31] | France      | RCT | nurses                                                 | EHR-based<br>clinical decision<br>support (n=15)<br><br>Empowered<br>patient group<br>(n=15)                                                                                                                                      | No intervention<br>(n=13)                                                                    | Skills (TDF)                                           | 24 weeks (10<br>week<br>intervention, 4<br>week washout,<br>10 week control) |
| Sassen et al. [24]   | Norway      | RCT | physicians<br>(orthopedic<br>surgeons)                 | Website with<br>educational<br>modules (n=48)                                                                                                                                                                                     | Waiting list (n=33)                                                                          | Intention (TDF)<br><br>Barriers (TDF)                  | 12 months                                                                    |
| Shenoy [37]          | Belgium     | RCT | physicians                                             | Multifaceted:<br>education, audit,<br>feedback (n=24)                                                                                                                                                                             | Mailed guidelines<br>(n=21)                                                                  | Knowledge                                              | 5 months                                                                     |
| Stewart et al. [32]  | Netherlands | RCT | physicians                                             | Email on-line<br>learning for two<br>evidence-based<br>cases (type 2<br>diabetes,<br>prevention)<br>(n=27)                                                                                                                        | Waiting list (n=31)                                                                          | Knowledge (TDF)<br><br>Skills (TDF)                    | 6 months                                                                     |
| Wolpin et al. [25]   | US          | RCT | medicine<br>residents and<br>fellows                   | Website enhanced<br>learning<br>(additional case<br>studies) (n=33)                                                                                                                                                               | Website with usual<br>care instructions<br>(same content,<br>without case<br>studies) (n=36) | Knowledge (TDF)<br><br>Perceived Ease of<br>Use (TAM2) | 12 weeks                                                                     |

\*A total of 63 countries were included. Please see publication for complete list.

\*\* cross-over design

CCTs = comparative controlled trials; CD-ROM = compact disc read-only memory; CDSS = computerized decision support system; CME = continuing medical education; CI = confidence interval; EHR = electronic health record; IQR = interquartile range (25<sup>th</sup> and 75<sup>th</sup> percentile); NR = not reported; OR =

odds ratio; RCT = randomized controlled trial; TAM2 = Technology Acceptance Model; TDF = Theoretical Domains Framework; UK = United Kingdom; US = United States of America
