# Supplementary material for: Information and Communication Technologies for the Dissemination of Clinical Practice Guidelines to Health Professionals: A Systematic Review
Source: PubMed Central journal article supplement (PMC5156823; doi:10.2196/mededu.6288), 2016-11-30
Supplement: mededu_v2i2e16_app4.pdf [file mededu_v2i2e16_app4.pdf]

| Study                    | Random sequence generation | Allocation concealment | Blinding of participants and personnel | Blinding of outcome assessment | Incomplete outcome data | Selective reporting | Other Bias |
|--------------------------|----------------------------|------------------------|----------------------------------------|--------------------------------|-------------------------|---------------------|------------|
| Balamuth et al. [22]     | +                          | ?                      | -                                      | ?                              | +                       | +                   | -          |
| Bell et al. [23]         | +                          | ?                      | -                                      | ?                              | +                       | +                   | +          |
| Bernhardsson et al. [33] | -                          | ?                      | ?                                      | ?                              | -                       | +                   | +          |
| Bullard et al. [26]      | +                          | -                      | -                                      | ?                              | +                       | +                   | -          |
| Butzlaff et al. [27]     | +                          | +                      | ?                                      | ?                              | +                       | +                   | +          |
| Chan et al. [34]         | ?                          | ?                      | ?                                      | ?                              | -                       | +                   | -          |
| Desimone et al. [35]     | ?                          | ?                      | -                                      | ?                              | ?                       | +                   | -          |
| Epstein et al. [20]      | +                          | ?                      | -                                      | ?                              | +                       | ?                   | -          |
| Gill et al. [30]         | ?                          | ?                      | ?                                      | ?                              | -                       | +                   | -          |
| Schroter et al. [17]     | +                          | +                      | ?                                      | ?                              | -                       | +                   | +          |
| Jousimaa et al. [28]     | +                          | ?                      | ?                                      | ?                              | +                       | ?                   | +          |
| Kerfoot et al. [21]      | +                          | ?                      | ?                                      | ?                              | -                       | ?                   | +          |
| Fordis et al. [29]       | +                          | ?                      | ?                                      | +                              | +                       | +                   | -          |
| Lobach et al. [19]       | -                          | ?                      | ?                                      | ?                              | ?                       | +                   | -          |
| McDonald et al. [36]     | +                          | ?                      | ?                                      | +                              | -                       | ?                   | -          |
| Fretheim et al. [18]     | +                          | +                      | +                                      | +                              | +                       | +                   | +          |
| Peremans et al. [31]     | +                          | ?                      | +                                      | ?                              | +                       | ?                   | +          |
| Sassen et al. [24]       | +                          | ?                      | ?                                      | ?                              | -                       | +                   | -          |
| Shenoy [37]              | ?                          | ?                      | ?                                      | ?                              | +                       | +                   | -          |
| Stewart et al. [32]      | +                          | ?                      | ?                                      | ?                              | -                       | ?                   | -          |
| Wolpin et al. [25]       | -                          | -                      | ?                                      | ?                              | -                       | ?                   | -          |

+ = low risk of bias; - = high risk of bias; ? = uncertain risk of bias
